# Supplementary material for: Sensor-based gait training to reduce contact time for runners with exercise-related lower leg pain: a randomised controlled trial
Source: HighWire-hosted journal article supplement (doi:10.1136/bmjsem-2021-001293), 2022-11-01
Supplement: bmjsem-2021-001293supp001_data_supplement.pdf [file bmjsem-2021-001293supp001_data_supplement.pdf]

| <b>Supplementary File 1. Clinical alignment, range of motion, strength, and functional assessment measure descriptions.</b> |                                         |                                                                                 |                                                                                 |
|-----------------------------------------------------------------------------------------------------------------------------|-----------------------------------------|---------------------------------------------------------------------------------|---------------------------------------------------------------------------------|
| <b>Body Region</b>                                                                                                          | <b>Alignment/Static Measures</b>        | <b>Range of Motion</b>                                                          | <b>Strength Measures</b>                                                        |
| 1 <sup>st</sup><br>Metatarophalangeal<br>(MTP) Joint                                                                        | n/a                                     | MTP flexion<br>MTP extension                                                    | MTP flexion                                                                     |
| Foot                                                                                                                        | Foot posture index<br>Arch Height Index | n/a                                                                             | n/a                                                                             |
| Ankle                                                                                                                       | Ankle weight-bearing<br>dorsiflexion    | Ankle dorsiflexion<br>Ankle plantarflexion<br>Ankle inversion<br>Ankle eversion | Ankle dorsiflexion<br>Ankle plantarflexion<br>Ankle inversion<br>Ankle eversion |
| Knee/Thigh                                                                                                                  | n/a                                     | Knee flexion<br>90°/90° Straight Leg<br>Raise                                   | Knee flexion<br>Knee extension                                                  |
| Hip                                                                                                                         | n/a                                     | Thomas test                                                                     | Hip flexion<br>Hip extension<br>Hip abduction                                   |
